# Supplementary material for: A Novel Gene Signature Associated With “E2F Target” Pathway for Predicting the Prognosis of Prostate Cancer
Source: Front Mol Biosci. 2022 Apr 13;9:838654. doi: 10.3389/fmolb.2022.838654 (PMC9045651; doi:10.3389/fmolb.2022.838654)
Supplement: Supplementary file 1 [file Table1.XLS]

## Sheet: ssgseaOut
id	TCGA-G9-6356-11A-01R-1789-07	TCGA-EJ-7785-11A-01R-2118-07	TCGA-G9-6384-11A-01R-1858-07	TCGA-EJ-7328-11A-01R-2118-07	TCGA-EJ-7793-11A-01R-2263-07	TCGA-EJ-7781-11A-01R-2118-07	TCGA-HC-7752-11A-01R-2118-07	TCGA-G9-6351-11A-01R-1965-07	TCGA-HC-7819-11A-01R-2118-07	TCGA-HC-7747-11A-01R-2118-07	TCGA-EJ-7123-11A-01R-1965-07	TCGA-G9-6362-11A-01R-1789-07	TCGA-EJ-7784-11A-01R-2118-07	TCGA-J4-A83J-11A-11R-A36G-07	TCGA-G9-6365-11A-01R-1789-07	TCGA-HC-7211-11A-01R-2118-07	TCGA-CH-5761-11A-01R-1580-07	TCGA-EJ-7115-11A-01R-2118-07	TCGA-G9-6333-11A-01R-1965-07	TCGA-HC-8262-11A-01R-2263-07	TCGA-HC-8260-11A-01R-2263-07	TCGA-HC-7740-11A-01R-2118-07	TCGA-EJ-7331-11A-01R-2118-07	TCGA-EJ-7794-11A-01R-2118-07	TCGA-EJ-7314-11A-01R-2118-07	TCGA-EJ-7786-11A-01R-2118-07	TCGA-EJ-7792-11A-01R-2118-07	TCGA-EJ-7315-11A-01R-2118-07	TCGA-CH-5767-11B-01R-1789-07	TCGA-EJ-7797-11A-01R-2263-07	TCGA-CH-5768-11A-01R-1580-07	TCGA-EJ-7789-11A-01R-2118-07	TCGA-HC-8259-11A-01R-2263-07	TCGA-HC-7737-11A-02R-2118-07	TCGA-EJ-7327-11A-01R-2118-07	TCGA-G9-6499-11A-02R-1965-07	TCGA-EJ-7782-11A-01R-2118-07	TCGA-CH-5769-11A-01R-1580-07	TCGA-HC-7742-11A-01R-2118-07	TCGA-EJ-7330-11A-01R-2118-07	TCGA-G9-6348-11A-01R-1789-07	TCGA-G9-6496-11A-01R-1789-07	TCGA-G9-6363-11A-01R-1789-07	TCGA-HC-7745-11A-01R-2118-07	TCGA-EJ-7321-11A-01R-2263-07	TCGA-HC-7738-11A-01R-2118-07	TCGA-EJ-7125-11A-01R-1965-07	TCGA-HC-8258-11A-01R-2263-07	TCGA-EJ-7317-11A-01R-2118-07
HALLMARK_TNFA_SIGNALING_VIA_NFKB	0.804115	0.751713	0.781082	0.800689	0.768842	0.796621	0.736684	0.711372	0.691062	0.699169	0.767575	0.743051	0.799915	0.852693	0.778559	0.728399	0.769045	0.708205	0.75471	0.839351	0.700083	0.722092	0.757589	0.840216	0.812451	0.827779	0.785216	0.809867	0.849382	0.763404	0.685586	0.765971	0.730622	0.7435	0.658132	0.750426	0.820085	0.779083	0.7294	0.824033	0.748571	0.765702	0.718931	0.72464	0.791879	0.740264	0.743876	0.730932	0.713902
HALLMARK_HYPOXIA	0.750419	0.760212	0.780808	0.791836	0.782041	0.785673	0.754484	0.754172	0.734075	0.733381	0.779561	0.73469	0.773492	0.776864	0.752715	0.726263	0.746907	0.745104	0.761405	0.79015	0.743029	0.745046	0.771654	0.782049	0.788751	0.798491	0.77708	0.777429	0.775234	0.766228	0.730629	0.760184	0.744912	0.754984	0.694914	0.756106	0.752563	0.749425	0.754125	0.792134	0.759057	0.779358	0.748728	0.748635	0.771797	0.760374	0.742195	0.739083	0.74584
HALLMARK_CHOLESTEROL_HOMEOSTASIS	0.830365	0.843248	0.872945	0.822852	0.844695	0.810313	0.811013	0.844945	0.844938	0.838205	0.822498	0.813556	0.849718	0.836604	0.846013	0.827319	0.837389	0.84973	0.833007	0.839034	0.858661	0.828745	0.847171	0.844048	0.854402	0.845817	0.832128	0.807291	0.843107	0.84901	0.845009	0.868542	0.822962	0.843068	0.837902	0.838533	0.852651	0.865515	0.84977	0.822261	0.823592	0.842405	0.858178	0.822527	0.855532	0.822758	0.841957	0.84194	0.871168
HALLMARK_MITOTIC_SPINDLE	0.713014	0.724121	0.721274	0.750188	0.744208	0.766838	0.74035	0.723173	0.74629	0.717375	0.753622	0.740544	0.745172	0.727372	0.694516	0.703507	0.740717	0.731886	0.710116	0.741982	0.718687	0.716171	0.749023	0.766746	0.764633	0.761263	0.74398	0.769541	0.738433	0.720445	0.72721	0.720311	0.718384	0.722897	0.737132	0.73727	0.70824	0.788397	0.739363	0.741409	0.719209	0.705763	0.760013	0.730423	0.732805	0.719445	0.68358	0.705529	0.740025
HALLMARK_WNT_BETA_CATENIN_SIGNALING	0.732358	0.719266	0.731548	0.735262	0.730691	0.733142	0.748044	0.736053	0.751611	0.719027	0.753766	0.712556	0.746913	0.76507	0.731141	0.700789	0.742712	0.730133	0.74423	0.749787	0.727198	0.71037	0.7318	0.759956	0.75403	0.760594	0.753091	0.764343	0.751315	0.71706	0.731729	0.723834	0.719882	0.707081	0.717148	0.706722	0.711207	0.718964	0.738775	0.759083	0.75087	0.739379	0.744646	0.730448	0.749316	0.724464	0.676237	0.691402	0.724808
HALLMARK_TGF_BETA_SIGNALING	0.859698	0.857375	0.866775	0.891177	0.862456	0.900224	0.850852	0.85083	0.851872	0.847071	0.882651	0.835418	0.885995	0.870674	0.84969	0.822928	0.849785	0.850552	0.872616	0.881004	0.844686	0.861013	0.874309	0.910232	0.888353	0.906572	0.881869	0.893921	0.878217	0.846618	0.861209	0.864281	0.840591	0.853625	0.821921	0.86723	0.859616	0.865785	0.852728	0.889265	0.859733	0.857479	0.881389	0.865829	0.874117	0.866237	0.828145	0.841398	0.856285
HALLMARK_IL6_JAK_STAT3_SIGNALING	0.657391	0.655152	0.619525	0.68968	0.657061	0.710906	0.677572	0.554221	0.590685	0.583645	0.64981	0.591315	0.679455	0.679854	0.590042	0.567174	0.638492	0.585915	0.61971	0.659937	0.564133	0.599271	0.681028	0.710344	0.68975	0.698561	0.682795	0.746757	0.683166	0.640873	0.541789	0.653589	0.612273	0.621868	0.577747	0.632668	0.709573	0.645255	0.602616	0.71381	0.624423	0.610307	0.581005	0.599594	0.655016	0.568028	0.650095	0.591602	0.591736
HALLMARK_DNA_REPAIR	0.836473	0.828956	0.823897	0.812711	0.829266	0.808906	0.831411	0.827641	0.823839	0.827348	0.802536	0.820003	0.821229	0.82179	0.831027	0.832653	0.827104	0.833993	0.834407	0.829992	0.823631	0.825299	0.816512	0.816606	0.81814	0.810452	0.823518	0.818233	0.828026	0.842575	0.826642	0.825591	0.833133	0.825811	0.831132	0.830799	0.833613	0.836708	0.826672	0.825823	0.830268	0.823585	0.833184	0.821178	0.820103	0.821915	0.844738	0.833192	0.822828
HALLMARK_G2M_CHECKPOINT	0.679882	0.673679	0.659468	0.682724	0.694522	0.691598	0.692646	0.681064	0.692479	0.651712	0.668532	0.73788	0.685065	0.663268	0.658554	0.647329	0.693179	0.691352	0.668397	0.681622	0.657706	0.657645	0.690491	0.703614	0.710838	0.683115	0.684221	0.713798	0.698905	0.677871	0.669842	0.668277	0.666362	0.657533	0.695736	0.73643	0.681929	0.799188	0.696714	0.685281	0.670242	0.662117	0.75313	0.651106	0.667832	0.647791	0.675458	0.642353	0.676415
HALLMARK_APOPTOSIS	0.824823	0.813653	0.818431	0.828431	0.811387	0.839139	0.805904	0.781095	0.783814	0.792277	0.811939	0.780751	0.82931	0.834674	0.804368	0.783472	0.803705	0.795327	0.805023	0.848704	0.792413	0.801278	0.822245	0.84868	0.83021	0.843317	0.82519	0.840095	0.839092	0.804283	0.779673	0.814799	0.803995	0.801121	0.770257	0.791734	0.832757	0.808926	0.793462	0.842115	0.798532	0.797839	0.795694	0.795291	0.824519	0.787861	0.807947	0.797721	0.786975
HALLMARK_NOTCH_SIGNALING	0.802077	0.825225	0.825894	0.857671	0.830804	0.862912	0.859342	0.814307	0.825966	0.777577	0.841999	0.819278	0.848504	0.848017	0.787348	0.753443	0.8322	0.820018	0.81164	0.821618	0.814323	0.780963	0.846068	0.858623	0.857619	0.861521	0.849986	0.852906	0.837438	0.827898	0.806081	0.816284	0.819613	0.791012	0.810009	0.838014	0.800848	0.807327	0.810459	0.848527	0.838314	0.819996	0.817558	0.807155	0.839206	0.798322	0.777533	0.775585	0.823843
HALLMARK_ADIPOGENESIS	0.819922	0.853153	0.849599	0.861255	0.854648	0.845225	0.842387	0.850301	0.842964	0.861084	0.853411	0.81464	0.846235	0.836388	0.826418	0.849734	0.83034	0.856915	0.841872	0.839268	0.840346	0.85739	0.857005	0.842104	0.857094	0.846196	0.847629	0.841705	0.84669	0.853297	0.832825	0.855533	0.845138	0.851741	0.83533	0.847772	0.84287	0.834957	0.858483	0.859406	0.845655	0.846245	0.841148	0.86215	0.843128	0.85665	0.85512	0.851488	0.846105
HALLMARK_ESTROGEN_RESPONSE_EARLY	0.789756	0.767123	0.793966	0.78159	0.775692	0.773101	0.759387	0.770036	0.770134	0.754174	0.762529	0.721846	0.798586	0.793509	0.766578	0.750176	0.789698	0.788753	0.779917	0.799284	0.763246	0.775349	0.771787	0.811459	0.800562	0.796299	0.779933	0.783631	0.809921	0.757261	0.774816	0.78063	0.748696	0.784926	0.750949	0.783135	0.769601	0.760019	0.788592	0.78758	0.759765	0.786425	0.772707	0.7599	0.788891	0.760755	0.741179	0.766266	0.778748
HALLMARK_ESTROGEN_RESPONSE_LATE	0.774965	0.750683	0.759105	0.754465	0.757457	0.75067	0.751684	0.740453	0.738499	0.744726	0.725233	0.718089	0.775214	0.76973	0.755422	0.741399	0.763704	0.766656	0.774794	0.783163	0.73785	0.765372	0.748408	0.789409	0.773919	0.764472	0.757993	0.76403	0.786166	0.745309	0.738959	0.765479	0.723439	0.769301	0.718203	0.766472	0.756985	0.75658	0.769401	0.777324	0.740186	0.774306	0.765093	0.754037	0.763786	0.749155	0.743121	0.755749	0.748884
HALLMARK_ANDROGEN_RESPONSE	0.935956	0.945231	0.944268	0.923984	0.958205	0.933605	0.900032	0.947884	0.948752	0.856967	0.918858	0.941274	0.963395	0.929752	0.91558	0.85762	0.935693	0.947146	0.895179	0.927965	0.95005	0.862639	0.949684	0.944741	0.960399	0.94878	0.943198	0.936017	0.944719	0.93945	0.941585	0.956104	0.942017	0.874584	0.958984	0.928295	0.950768	0.937641	0.953296	0.922924	0.900663	0.924907	0.928086	0.85613	0.948669	0.861764	0.929705	0.855525	0.97044
HALLMARK_MYOGENESIS	0.57614	0.778116	0.758463	0.820086	0.672419	0.762061	0.691563	0.668627	0.638064	0.64069	0.892068	0.608847	0.694543	0.687536	0.630892	0.624512	0.603174	0.663694	0.683152	0.621872	0.663402	0.650648	0.82038	0.659331	0.68922	0.698406	0.660988	0.757739	0.641422	0.671546	0.60109	0.634643	0.703567	0.637314	0.587236	0.644648	0.615039	0.596176	0.645776	0.70091	0.772087	0.682588	0.651608	0.68427	0.647177	0.658743	0.640264	0.631948	0.644757
HALLMARK_PROTEIN_SECRETION	0.89298	0.904557	0.894735	0.894192	0.913792	0.909673	0.863114	0.894303	0.909315	0.901218	0.888839	0.882107	0.921947	0.873634	0.877898	0.89653	0.894179	0.905298	0.883692	0.894123	0.905525	0.899446	0.912982	0.905294	0.910944	0.907384	0.910193	0.908807	0.904724	0.900354	0.910184	0.914047	0.904751	0.901885	0.92188	0.886764	0.913241	0.892023	0.905488	0.895607	0.86516	0.879844	0.896708	0.885801	0.900393	0.898083	0.904287	0.90139	0.91983
HALLMARK_INTERFERON_ALPHA_RESPONSE	0.831267	0.789527	0.766189	0.800289	0.780732	0.801414	0.791741	0.736459	0.756751	0.746078	0.751297	0.701348	0.809628	0.811785	0.77552	0.7363	0.777449	0.756942	0.778311	0.801013	0.737046	0.782957	0.8043	0.823116	0.786102	0.77078	0.800687	0.828978	0.815472	0.799761	0.736374	0.815991	0.766297	0.769153	0.750444	0.751486	0.81626	0.765698	0.752984	0.81663	0.753727	0.75908	0.764364	0.759716	0.813623	0.740071	0.797573	0.776548	0.753093
HALLMARK_INTERFERON_GAMMA_RESPONSE	0.765135	0.738767	0.710935	0.754635	0.732279	0.770981	0.731025	0.669471	0.689138	0.672184	0.714407	0.641298	0.761829	0.755769	0.695866	0.653554	0.722297	0.697451	0.713062	0.753047	0.668259	0.702432	0.753279	0.780853	0.745684	0.748083	0.758457	0.802256	0.759419	0.740395	0.658099	0.752989	0.704602	0.707697	0.681712	0.706909	0.777014	0.713078	0.700928	0.781482	0.697759	0.695658	0.697436	0.690003	0.753036	0.672365	0.745586	0.697377	0.687423
HALLMARK_APICAL_JUNCTION	0.672096	0.729644	0.743687	0.765541	0.733533	0.763164	0.733329	0.710627	0.725216	0.698442	0.763021	0.65445	0.735533	0.726707	0.680155	0.675741	0.704933	0.723987	0.718395	0.714444	0.712541	0.707906	0.764635	0.746911	0.743873	0.752211	0.740148	0.773056	0.715114	0.713752	0.69669	0.715505	0.709393	0.712246	0.684908	0.708115	0.700313	0.693181	0.727179	0.747946	0.731347	0.723133	0.724129	0.73333	0.729324	0.708613	0.68178	0.677642	0.717146
HALLMARK_APICAL_SURFACE	0.666672	0.641202	0.645503	0.656864	0.657351	0.676463	0.643422	0.647445	0.650935	0.62103	0.635288	0.510439	0.675359	0.658132	0.645086	0.621901	0.656584	0.659708	0.672233	0.66307	0.633925	0.623331	0.665284	0.690848	0.670072	0.658406	0.67195	0.69407	0.655934	0.638104	0.643152	0.653021	0.622698	0.673962	0.603388	0.607551	0.639624	0.598837	0.645927	0.686034	0.637026	0.673584	0.646953	0.666032	0.67451	0.636446	0.620191	0.637207	0.646069
HALLMARK_HEDGEHOG_SIGNALING	0.58161	0.580582	0.617259	0.625987	0.607309	0.626456	0.556475	0.600807	0.613303	0.623223	0.637783	0.64122	0.643392	0.624011	0.551155	0.613159	0.593126	0.609845	0.598739	0.580237	0.595913	0.648352	0.636977	0.668474	0.652391	0.633592	0.612035	0.646308	0.588641	0.559946	0.595798	0.604868	0.601078	0.624323	0.572284	0.561924	0.583902	0.601291	0.618699	0.644693	0.604125	0.61546	0.618174	0.640132	0.630251	0.635594	0.508867	0.613348	0.627652
HALLMARK_COMPLEMENT	0.655917	0.651212	0.631832	0.674182	0.67594	0.684144	0.653935	0.604216	0.614106	0.608642	0.664751	0.595108	0.684754	0.65106	0.608573	0.597549	0.637809	0.632636	0.634823	0.672928	0.595569	0.620714	0.673758	0.703107	0.67124	0.69054	0.686826	0.714603	0.664055	0.645412	0.587639	0.662065	0.631273	0.632498	0.595308	0.638041	0.686654	0.634708	0.646348	0.703161	0.62826	0.63706	0.630812	0.626962	0.657719	0.610392	0.658046	0.608724	0.629073
HALLMARK_UNFOLDED_PROTEIN_RESPONSE	0.881483	0.869868	0.876608	0.864998	0.877062	0.8598	0.856511	0.875395	0.869592	0.880739	0.859601	0.887697	0.877331	0.873978	0.878995	0.890841	0.874687	0.870321	0.868035	0.880672	0.873212	0.8789	0.871003	0.868792	0.884508	0.875384	0.875785	0.867625	0.885601	0.873795	0.862483	0.87708	0.875996	0.875914	0.87083	0.869385	0.871336	0.887911	0.879135	0.872811	0.863106	0.87564	0.88174	0.874367	0.876215	0.884664	0.867156	0.89762	0.875751
HALLMARK_PI3K_AKT_MTOR_SIGNALING	0.784306	0.783191	0.773265	0.78529	0.793209	0.794108	0.776888	0.77075	0.769664	0.746578	0.789321	0.776176	0.78807	0.778247	0.758663	0.739108	0.776094	0.783707	0.776837	0.79188	0.766158	0.742193	0.789263	0.785938	0.788109	0.78446	0.78725	0.797812	0.77282	0.779278	0.761532	0.785099	0.765849	0.748246	0.777188	0.776077	0.783125	0.782307	0.775039	0.793914	0.775353	0.76374	0.775599	0.765721	0.770515	0.750196	0.763436	0.753714	0.76895
HALLMARK_MTORC1_SIGNALING	0.866013	0.862249	0.860875	0.857007	0.874295	0.855733	0.840914	0.854431	0.856662	0.840684	0.852406	0.865855	0.868114	0.849604	0.847413	0.851179	0.856179	0.862866	0.850301	0.872222	0.85259	0.845276	0.866883	0.861232	0.873466	0.866415	0.858395	0.863106	0.864152	0.866804	0.843426	0.872624	0.85422	0.850195	0.862824	0.86523	0.87464	0.890148	0.867798	0.863701	0.842072	0.857355	0.879372	0.835685	0.85923	0.84137	0.868018	0.852722	0.865013
HALLMARK_E2F_TARGETS	0.685094	0.680139	0.657362	0.677685	0.694414	0.685938	0.693588	0.67933	0.684498	0.655218	0.658384	0.742715	0.684459	0.663017	0.663837	0.655294	0.692196	0.688392	0.669213	0.683627	0.655148	0.664719	0.682188	0.697726	0.703607	0.677318	0.683728	0.710412	0.695246	0.691369	0.663917	0.668913	0.665118	0.664549	0.696764	0.735042	0.686587	0.802507	0.689506	0.6854	0.667368	0.659364	0.754457	0.653946	0.661957	0.655666	0.694919	0.653504	0.66875
HALLMARK_MYC_TARGETS_V1	0.939988	0.942883	0.930066	0.931666	0.940576	0.93197	0.935985	0.935253	0.933586	0.929094	0.927237	0.958208	0.93644	0.924664	0.938758	0.937085	0.934085	0.942762	0.938468	0.945977	0.934717	0.934896	0.93341	0.931962	0.938808	0.929584	0.936875	0.93547	0.945202	0.948565	0.93944	0.938814	0.941457	0.931092	0.94176	0.955505	0.942882	0.972165	0.941543	0.94077	0.936689	0.934147	0.962077	0.927701	0.924858	0.931252	0.951478	0.936228	0.933351
HALLMARK_MYC_TARGETS_V2	0.833993	0.787404	0.804141	0.791746	0.806199	0.771543	0.80347	0.813059	0.797285	0.787981	0.772657	0.824744	0.794534	0.803284	0.826917	0.817652	0.815646	0.811077	0.829812	0.850667	0.80281	0.785822	0.785114	0.79345	0.799963	0.777979	0.789811	0.781491	0.81845	0.799795	0.809055	0.790632	0.789277	0.785286	0.797906	0.855479	0.784194	0.876755	0.827168	0.800055	0.814439	0.820816	0.846618	0.791958	0.791199	0.785263	0.79746	0.803038	0.793001
HALLMARK_EPITHELIAL_MESENCHYMAL_TRANSITION	0.679148	0.778175	0.779597	0.831132	0.786904	0.841502	0.792326	0.744186	0.738564	0.746915	0.829723	0.729358	0.792261	0.790227	0.70791	0.681867	0.708725	0.752059	0.783169	0.749314	0.722497	0.757543	0.815544	0.841539	0.815423	0.860553	0.813231	0.848886	0.765414	0.77578	0.711001	0.76838	0.75624	0.779217	0.687421	0.805344	0.772266	0.771077	0.756315	0.834001	0.787848	0.795949	0.788177	0.795223	0.785734	0.771711	0.734947	0.706387	0.747717
HALLMARK_INFLAMMATORY_RESPONSE	0.599756	0.583367	0.571245	0.611123	0.606359	0.643923	0.57474	0.514991	0.526888	0.520271	0.598429	0.514122	0.629516	0.624585	0.520887	0.510147	0.577634	0.546656	0.572928	0.636843	0.49916	0.521525	0.616072	0.672477	0.632673	0.662032	0.626769	0.679025	0.635907	0.581015	0.507394	0.599749	0.545805	0.548707	0.505538	0.567003	0.657776	0.580964	0.563186	0.662712	0.550986	0.543028	0.553027	0.539353	0.599329	0.523449	0.593995	0.535909	0.539068
HALLMARK_XENOBIOTIC_METABOLISM	0.630548	0.630151	0.62115	0.630179	0.650703	0.622202	0.632401	0.629708	0.619352	0.616725	0.604381	0.597577	0.636044	0.629988	0.596071	0.602008	0.620137	0.649019	0.617764	0.639937	0.625818	0.62759	0.64094	0.636928	0.651206	0.64508	0.652287	0.643587	0.635467	0.644529	0.607849	0.642648	0.633262	0.629557	0.61107	0.623435	0.633679	0.615508	0.633776	0.643154	0.620976	0.641446	0.622994	0.62359	0.640481	0.615113	0.643332	0.621587	0.638216
HALLMARK_FATTY_ACID_METABOLISM	0.774921	0.78796	0.777641	0.779632	0.78835	0.762539	0.760634	0.785292	0.769552	0.773269	0.768769	0.743836	0.77466	0.76236	0.756652	0.769147	0.774758	0.795303	0.775398	0.774624	0.780614	0.784233	0.785697	0.766513	0.780675	0.759303	0.77185	0.766279	0.776298	0.790095	0.772315	0.784712	0.779206	0.783392	0.776737	0.758634	0.781076	0.764244	0.777555	0.777787	0.770587	0.776503	0.777792	0.777365	0.778737	0.773918	0.798432	0.775062	0.783447
HALLMARK_OXIDATIVE_PHOSPHORYLATION	0.940736	0.954359	0.943729	0.942209	0.947657	0.930477	0.942042	0.950063	0.938135	0.955689	0.944663	0.948205	0.935072	0.924987	0.942801	0.957126	0.931328	0.950367	0.948324	0.937669	0.947343	0.951851	0.939804	0.917447	0.938528	0.92224	0.937862	0.921787	0.935591	0.959167	0.939627	0.948987	0.950613	0.952287	0.944459	0.946807	0.954465	0.946108	0.943479	0.947074	0.949454	0.948158	0.952675	0.949255	0.933108	0.954696	0.970916	0.960102	0.941667
HALLMARK_GLYCOLYSIS	0.754032	0.75163	0.748106	0.753813	0.765004	0.746206	0.744186	0.754989	0.748764	0.747435	0.737767	0.743245	0.756715	0.74581	0.747675	0.75315	0.758137	0.759104	0.749998	0.753869	0.746961	0.760757	0.759805	0.755279	0.760993	0.757908	0.756847	0.7555	0.757043	0.752645	0.73732	0.758414	0.743155	0.74646	0.742697	0.769168	0.750395	0.764394	0.765118	0.758676	0.739014	0.760564	0.772018	0.75429	0.754689	0.74821	0.754721	0.75453	0.7547
HALLMARK_REACTIVE_OXYGEN_SPECIES_PATHWAY	0.866193	0.858103	0.865625	0.865843	0.871089	0.860786	0.857113	0.863449	0.858922	0.841502	0.859156	0.841808	0.857085	0.854837	0.847544	0.838004	0.862139	0.859293	0.862641	0.859824	0.85479	0.850479	0.867234	0.851486	0.860439	0.856293	0.859922	0.865548	0.864106	0.860921	0.85159	0.868449	0.861575	0.8436	0.853008	0.857024	0.861445	0.870565	0.874187	0.873464	0.859914	0.865432	0.86163	0.854115	0.860429	0.838732	0.860461	0.840662	0.859976
HALLMARK_P53_PATHWAY	0.838469	0.801828	0.814788	0.812603	0.80233	0.804854	0.801035	0.793171	0.797205	0.789523	0.798397	0.770465	0.82107	0.83896	0.814378	0.793047	0.810938	0.799476	0.823002	0.858777	0.794732	0.796065	0.804457	0.825003	0.82095	0.818421	0.806972	0.818025	0.844186	0.805864	0.801073	0.807779	0.79449	0.803683	0.781248	0.793695	0.813297	0.797655	0.793848	0.829256	0.801474	0.806757	0.804242	0.788184	0.811649	0.786512	0.799956	0.794375	0.79364
HALLMARK_UV_RESPONSE_UP	0.756197	0.757996	0.773565	0.769155	0.771421	0.764407	0.750691	0.765903	0.740131	0.756459	0.762603	0.75721	0.75846	0.765001	0.743337	0.750344	0.752837	0.755534	0.761826	0.772786	0.745349	0.751335	0.763093	0.767109	0.770299	0.768326	0.764355	0.767371	0.763685	0.758179	0.728787	0.758285	0.758846	0.751706	0.728246	0.761091	0.758221	0.757663	0.756811	0.777689	0.760822	0.76403	0.768344	0.750772	0.758234	0.760842	0.756233	0.756225	0.75592
HALLMARK_UV_RESPONSE_DN	0.723286	0.784795	0.783636	0.821059	0.789058	0.834946	0.782057	0.762566	0.777464	0.761373	0.829545	0.753688	0.800774	0.771028	0.72438	0.726308	0.741002	0.775268	0.769149	0.77582	0.763491	0.76369	0.80834	0.824798	0.817678	0.834199	0.802713	0.825947	0.779438	0.774348	0.773776	0.771344	0.76322	0.771439	0.743097	0.779201	0.759587	0.736626	0.769929	0.807625	0.776591	0.766821	0.766812	0.783504	0.782702	0.780731	0.735863	0.740813	0.782453
HALLMARK_ANGIOGENESIS	0.582867	0.690471	0.684284	0.755361	0.707081	0.720064	0.71676	0.638088	0.662795	0.707486	0.712554	0.68281	0.683814	0.717934	0.612641	0.707157	0.635921	0.663231	0.712591	0.673371	0.641057	0.727686	0.744179	0.761934	0.735923	0.782931	0.725565	0.751218	0.675677	0.676309	0.589021	0.684512	0.647372	0.746487	0.608115	0.689629	0.674177	0.705441	0.672901	0.76419	0.678127	0.656488	0.698373	0.760279	0.675099	0.737608	0.63909	0.704746	0.649607
HALLMARK_HEME_METABOLISM	0.671268	0.679851	0.675216	0.680578	0.682688	0.678677	0.659853	0.678794	0.675853	0.688411	0.688203	0.64772	0.693513	0.669443	0.6548	0.666485	0.665866	0.684556	0.676222	0.682242	0.665677	0.687972	0.681945	0.689823	0.676343	0.685776	0.688197	0.676712	0.676614	0.675919	0.668115	0.695481	0.678543	0.706356	0.672826	0.671904	0.679273	0.669702	0.678425	0.690004	0.664001	0.66943	0.676754	0.683803	0.683878	0.676739	0.676548	0.687359	0.686974
HALLMARK_COAGULATION	0.534946	0.540782	0.520675	0.562322	0.562705	0.568495	0.564817	0.509869	0.526027	0.538166	0.555537	0.489708	0.574194	0.560918	0.502204	0.508666	0.517459	0.540229	0.553379	0.540882	0.506132	0.57585	0.567984	0.592211	0.560764	0.58827	0.60193	0.593104	0.550508	0.52796	0.497353	0.558802	0.526024	0.561216	0.490347	0.549808	0.569116	0.571569	0.544796	0.596068	0.545635	0.551086	0.564571	0.568679	0.561402	0.530666	0.535056	0.521609	0.526023
HALLMARK_IL2_STAT5_SIGNALING	0.690516	0.69114	0.683065	0.718478	0.69989	0.730618	0.693746	0.655051	0.650887	0.664714	0.711534	0.6614	0.708785	0.714577	0.654601	0.651734	0.665058	0.671695	0.68611	0.702892	0.649352	0.678622	0.711124	0.736633	0.72054	0.731169	0.71439	0.754021	0.711617	0.692939	0.630207	0.693127	0.666533	0.689582	0.635018	0.690783	0.71984	0.682963	0.667702	0.73805	0.672683	0.683086	0.678207	0.678083	0.699591	0.678316	0.678121	0.67248	0.656103
HALLMARK_BILE_ACID_METABOLISM	0.573714	0.600245	0.59975	0.595147	0.611051	0.596834	0.567512	0.602476	0.591032	0.591371	0.595041	0.563589	0.604775	0.589264	0.578896	0.57949	0.577834	0.623759	0.590879	0.580242	0.602666	0.607073	0.61093	0.604349	0.60307	0.593454	0.610735	0.593759	0.5801	0.59625	0.597447	0.610011	0.594569	0.609195	0.583915	0.605685	0.609252	0.574483	0.616304	0.59847	0.573193	0.607988	0.609233	0.589723	0.601339	0.588077	0.601217	0.594631	0.598354
HALLMARK_PEROXISOME	0.774386	0.766865	0.76217	0.76403	0.776755	0.757131	0.755061	0.780227	0.769977	0.741989	0.736943	0.754812	0.777996	0.753232	0.765067	0.74165	0.757105	0.781123	0.760573	0.766032	0.768718	0.759946	0.78207	0.766013	0.774583	0.749741	0.771999	0.757193	0.769618	0.774337	0.773969	0.779163	0.763765	0.750301	0.769301	0.753284	0.770386	0.74087	0.773164	0.765001	0.761572	0.777851	0.784489	0.745177	0.772925	0.738484	0.772411	0.745035	0.776188
HALLMARK_ALLOGRAFT_REJECTION	0.608307	0.597394	0.551187	0.612485	0.604861	0.654508	0.609018	0.522821	0.524744	0.485046	0.590128	0.515692	0.612542	0.615764	0.542884	0.462873	0.584893	0.549874	0.565054	0.594322	0.497675	0.481609	0.627683	0.649081	0.610926	0.630778	0.634626	0.717348	0.602738	0.590445	0.480297	0.59972	0.540047	0.511578	0.523715	0.574496	0.667823	0.581496	0.564283	0.66347	0.567411	0.560929	0.554928	0.527689	0.607397	0.483797	0.601252	0.517496	0.531345
HALLMARK_SPERMATOGENESIS	0.28139	0.285854	0.270767	0.273431	0.314831	0.294525	0.261486	0.293421	0.280608	0.241514	0.28262	0.291098	0.303291	0.245313	0.260667	0.269973	0.281626	0.296426	0.264913	0.257544	0.295236	0.237016	0.287167	0.28745	0.289377	0.260374	0.281142	0.300551	0.276291	0.298369	0.288035	0.276341	0.277542	0.252292	0.2668	0.306902	0.290016	0.28044	0.295483	0.288741	0.269576	0.270652	0.316262	0.244247	0.286272	0.250441	0.288014	0.260086	0.293078
HALLMARK_KRAS_SIGNALING_UP	0.631433	0.648194	0.607323	0.665218	0.652941	0.688543	0.64485	0.588602	0.592207	0.593516	0.64833	0.61468	0.674676	0.656302	0.580242	0.563427	0.610167	0.618595	0.627722	0.660173	0.574427	0.610733	0.666651	0.704483	0.671098	0.700118	0.672644	0.711664	0.646162	0.636825	0.580719	0.652168	0.605545	0.609307	0.577395	0.629882	0.68392	0.626495	0.621637	0.700072	0.605681	0.626409	0.633649	0.611514	0.638857	0.602116	0.638758	0.592876	0.617004
HALLMARK_KRAS_SIGNALING_DN	0.344864	0.323589	0.299838	0.346502	0.317104	0.332998	0.29654	0.309677	0.290435	0.263711	0.34441	0.24234	0.362895	0.332884	0.315833	0.267637	0.312705	0.338372	0.343866	0.332725	0.318839	0.293261	0.347313	0.359417	0.338268	0.297284	0.32397	0.354281	0.329517	0.327147	0.320154	0.329947	0.285489	0.322492	0.258492	0.304619	0.34296	0.258401	0.330645	0.341766	0.321165	0.347374	0.330205	0.29187	0.35283	0.289595	0.306095	0.275507	0.317192
HALLMARK_PANCREAS_BETA_CELLS	0.318655	0.242305	0.266809	0.234126	0.28359	0.275717	0.17349	0.314696	0.224267	0.252684	0.222788	0.410262	0.285479	0.2741	0.281944	0.256129	0.300047	0.27401	0.282548	0.238543	0.237859	0.307938	0.256135	0.288721	0.272152	0.218927	0.268666	0.261651	0.257546	0.207139	0.335208	0.260117	0.203768	0.214559	0.166584	0.290675	0.276542	0.270985	0.296727	0.303181	0.265111	0.316141	0.360996	0.225343	0.250025	0.262551	0.18754	0.196979	0.262937
[truncated: 491 more columns]

## Sheet: ssgsea.uniCox
id	HR	HR.95L	HR.95H	pvalue
CHOLESTEROL_HOMEOSTASIS	1.83e-05	3.91e-10	0.856778	0.0467966
MITOTIC_SPINDLE	564154	143.887	2211947031	0.00170669
DNA_REPAIR	4.58e+22	112573000000000	1.87e+31	2.49e-07
G2M_CHECKPOINT	575732	2972.38	1.11515e+08	7.96e-07
ADIPOGENESIS	5.4e-08	6.97e-13	0.0041895	0.00357809
ESTROGEN_RESPONSE_EARLY	2.3e-06	1.4e-09	0.0037714	0.000587078
ESTROGEN_RESPONSE_LATE	2.91e-05	2.31e-08	0.0366847	0.00413857
ANDROGEN_RESPONSE	1.34e-06	5.56e-10	0.00322752	0.000664642
MYOGENESIS	0.0228242	0.000704026	0.739952	0.0332009
PROTEIN_SECRETION	6.92e-05	2.35e-08	0.20407	0.0187799
APICAL_SURFACE	0.00705635	7.89e-05	0.631169	0.0307202
E2F_TARGETS	475180	4555.32	4.95675e+07	3.53e-08
MYC_TARGETS_V1	3793170000000000	1.4705e+08	9.78e+22	3.79e-05
MYC_TARGETS_V2	165230	15.198	1796341278	0.0112826
FATTY_ACID_METABOLISM	1.04e-08	3.77e-14	0.00287032	0.00403123
BILE_ACID_METABOLISM	3.22e-05	2.76e-09	0.375502	0.0303883
KRAS_SIGNALING_DN	0.00161611	8.21e-06	0.318218	0.0170892

## Sheet: zscore
id	risk	E2F_TARGETS	mean	sd	z-score
TCGA-ZG-A9LU-01	high	0.735456	0.718809	0.0393077	0.423522
TCGA-EJ-5531-01	high	0.744327	0.718809	0.0393077	0.649186
TCGA-EJ-7785-01	low	0.71239	0.718809	0.0393077	-0.163291
TCGA-G9-6363-01	high	0.758997	0.718809	0.0393077	1.0224
TCGA-H9-A6BX-01	low	0.701083	0.718809	0.0393077	-0.450948
TCGA-V1-A8WN-01	low	0.694477	0.718809	0.0393077	-0.618988
TCGA-KK-A8IL-01	high	0.719404	0.718809	0.0393077	0.0151597
TCGA-EJ-A65F-01	low	0.713941	0.718809	0.0393077	-0.123823
TCGA-G9-6338-01	low	0.669258	0.718809	0.0393077	-1.26057
TCGA-V1-A8MK-01	low	0.679105	0.718809	0.0393077	-1.01006
TCGA-EJ-7331-01	low	0.711977	0.718809	0.0393077	-0.173808
TCGA-G9-6377-01	low	0.703076	0.718809	0.0393077	-0.400227
TCGA-EJ-5525-01	high	0.799658	0.718809	0.0393077	2.05685
TCGA-CH-5751-01	high	0.843337	0.718809	0.0393077	3.16805
TCGA-CH-5753-01	high	0.722572	0.718809	0.0393077	0.0957546
TCGA-EJ-A8FS-01	high	0.72912	0.718809	0.0393077	0.26233
TCGA-HC-7080-01	low	0.705183	0.718809	0.0393077	-0.34663
TCGA-J9-A52E-01	high	0.791346	0.718809	0.0393077	1.84538
TCGA-HC-A9TE-01	low	0.675792	0.718809	0.0393077	-1.09435
TCGA-X4-A8KS-01	low	0.6714	0.718809	0.0393077	-1.2061
TCGA-CH-5788-01	high	0.823221	0.718809	0.0393077	2.65629
TCGA-G9-7510-01	low	0.700412	0.718809	0.0393077	-0.468018
TCGA-TP-A8TT-01	low	0.681486	0.718809	0.0393077	-0.949489
TCGA-HC-8256-01	high	0.731851	0.718809	0.0393077	0.331818
TCGA-VP-A876-01	high	0.772868	0.718809	0.0393077	1.37528
TCGA-YL-A8S8-01	high	0.76153	0.718809	0.0393077	1.08684
TCGA-VP-A87H-01	high	0.753408	0.718809	0.0393077	0.880209
TCGA-KK-A8I6-01	high	0.721263	0.718809	0.0393077	0.0624328
TCGA-M7-A722-01	high	0.761605	0.718809	0.0393077	1.08874
TCGA-2A-A8VV-01	low	0.705637	0.718809	0.0393077	-0.335092
TCGA-G9-6371-01	low	0.711575	0.718809	0.0393077	-0.184028
TCGA-J4-A67K-01	low	0.69159	0.718809	0.0393077	-0.692445
TCGA-EJ-7125-01	high	0.749964	0.718809	0.0393077	0.792605
TCGA-V1-A9OY-01	low	0.704396	0.718809	0.0393077	-0.366664
TCGA-ZG-A9LN-01	high	0.764778	0.718809	0.0393077	1.16948
TCGA-KK-A6E6-01	low	0.716512	0.718809	0.0393077	-0.0584239
TCGA-CH-5748-01	high	0.740501	0.718809	0.0393077	0.551861
TCGA-CH-5743-01	low	0.700909	0.718809	0.0393077	-0.455379
TCGA-KK-A8IC-01	high	0.736813	0.718809	0.0393077	0.458032
TCGA-EJ-A8FU-01	low	0.686673	0.718809	0.0393077	-0.817532
TCGA-V1-A9ZR-01	low	0.654453	0.718809	0.0393077	-1.63722
TCGA-EJ-A65B-01	low	0.708444	0.718809	0.0393077	-0.263671
TCGA-CH-5764-01	low	0.714764	0.718809	0.0393077	-0.102894
TCGA-VN-A88M-01	low	0.694516	0.718809	0.0393077	-0.617999
TCGA-EJ-5503-01	low	0.691669	0.718809	0.0393077	-0.69043
TCGA-J4-A67L-01	high	0.721708	0.718809	0.0393077	0.073769
TCGA-EJ-5530-01	low	0.711303	0.718809	0.0393077	-0.190935
TCGA-QU-A6IO-01	low	0.665849	0.718809	0.0393077	-1.34731
TCGA-VP-A879-01	low	0.649274	0.718809	0.0393077	-1.76897
TCGA-V1-A9O5-01	high	0.830316	0.718809	0.0393077	2.83679
TCGA-VP-A878-01	low	0.702358	0.718809	0.0393077	-0.418498
TCGA-4L-AA1F-01	high	0.747411	0.718809	0.0393077	0.727661
TCGA-KC-A7F6-01	high	0.72008	0.718809	0.0393077	0.0323548
TCGA-KK-A8IK-01	high	0.779782	0.718809	0.0393077	1.55117
TCGA-EJ-A65E-01	high	0.738487	0.718809	0.0393077	0.500619
TCGA-EJ-7792-01	low	0.690931	0.718809	0.0393077	-0.70922
TCGA-KK-A8I8-01	high	0.734087	0.718809	0.0393077	0.3887
TCGA-V1-A8WL-01	low	0.68322	0.718809	0.0393077	-0.90538
TCGA-YL-A8HJ-01	low	0.707196	0.718809	0.0393077	-0.295433
TCGA-KK-A59Z-01	low	0.693639	0.718809	0.0393077	-0.640328
TCGA-HC-7749-01	low	0.700742	0.718809	0.0393077	-0.459607
TCGA-HC-A6AP-01	low	0.712793	0.718809	0.0393077	-0.153042
TCGA-QU-A6IM-01	low	0.664927	0.718809	0.0393077	-1.37076
TCGA-EJ-7314-01	high	0.727534	0.718809	0.0393077	0.221984
TCGA-J4-AATV-01	low	0.674308	0.718809	0.0393077	-1.13209
TCGA-H9-7775-01	low	0.694711	0.718809	0.0393077	-0.613048
TCGA-EJ-A65J-01	low	0.7104	0.718809	0.0393077	-0.21391
TCGA-KK-A7AP-01	low	0.70883	0.718809	0.0393077	-0.253849
TCGA-YL-A8HL-01	low	0.718652	0.718809	0.0393077	-0.00398418
TCGA-EJ-5518-01	high	0.759207	0.718809	0.0393077	1.02775
TCGA-HC-A632-01	high	0.731399	0.718809	0.0393077	0.320314
TCGA-ZG-A9LZ-01	high	0.7243	0.718809	0.0393077	0.139715
TCGA-EJ-5499-01	high	0.79165	0.718809	0.0393077	1.85312
TCGA-ZG-A9L1-01	high	0.748937	0.718809	0.0393077	0.766465
TCGA-CH-5769-01	high	0.806973	0.718809	0.0393077	2.24293
TCGA-G9-6378-01	low	0.682245	0.718809	0.0393077	-0.930195
TCGA-FC-7708-01	low	0.685401	0.718809	0.0393077	-0.849887
TCGA-KK-A6E3-01	low	0.668779	0.718809	0.0393077	-1.27276
TCGA-M7-A720-01	low	0.674625	0.718809	0.0393077	-1.12404
TCGA-KK-A8I5-01	low	0.679959	0.718809	0.0393077	-0.988349
TCGA-HI-7171-01	high	0.741905	0.718809	0.0393077	0.587587
TCGA-G9-6342-01	low	0.708787	0.718809	0.0393077	-0.254958
TCGA-V1-A8WV-01	high	0.763458	0.718809	0.0393077	1.1359
TCGA-YL-A9WY-01	high	0.767351	0.718809	0.0393077	1.23494
TCGA-EJ-5507-01	high	0.754708	0.718809	0.0393077	0.913304
TCGA-M7-A725-01	high	0.783356	0.718809	0.0393077	1.64212
TCGA-HC-7230-01	high	0.747611	0.718809	0.0393077	0.732749
TCGA-J4-A67R-01	low	0.668562	0.718809	0.0393077	-1.27828
TCGA-J9-A8CP-01	low	0.699473	0.718809	0.0393077	-0.491896
TCGA-KK-A8IB-01	high	0.738187	0.718809	0.0393077	0.492995
TCGA-CH-5767-01	low	0.703839	0.718809	0.0393077	-0.380829
TCGA-EJ-5512-01	low	0.680622	0.718809	0.0393077	-0.971467
TCGA-KK-A6E8-01	high	0.721047	0.718809	0.0393077	0.0569377
TCGA-M7-A71Z-01	high	0.733217	0.718809	0.0393077	0.366564
TCGA-ZG-A9L9-01	high	0.7703	0.718809	0.0393077	1.30996
TCGA-G9-A9S0-01	high	0.781692	0.718809	0.0393077	1.59977
TCGA-ZG-A9KY-01	high	0.821938	0.718809	0.0393077	2.62365
TCGA-V1-A9ZG-01	high	0.7247	0.718809	0.0393077	0.149892
TCGA-2A-A8VT-01	high	0.72709	0.718809	0.0393077	0.210694
TCGA-G9-6496-01	high	0.744466	0.718809	0.0393077	0.652729
TCGA-ZG-A8QX-01	low	0.715067	0.718809	0.0393077	-0.0951852
TCGA-EJ-5504-01	high	0.739141	0.718809	0.0393077	0.517257
TCGA-EJ-7123-01	high	0.734278	0.718809	0.0393077	0.393549
TCGA-HC-8258-01	low	0.586163	0.718809	0.0393077	-3.37454
TCGA-HC-7744-01	high	0.784303	0.718809	0.0393077	1.66621
TCGA-M7-A71Y-01	low	0.686268	0.718809	0.0393077	-0.827853
TCGA-EJ-A6RA-01	low	0.696224	0.718809	0.0393077	-0.574565
TCGA-EJ-5496-01	low	0.715792	0.718809	0.0393077	-0.0767358
TCGA-CH-5752-01	high	0.790446	0.718809	0.0393077	1.82248
TCGA-CH-5741-01	high	0.719304	0.718809	0.0393077	0.0125978
TCGA-EJ-5498-01	low	0.694713	0.718809	0.0393077	-0.61299
TCGA-ZG-A9LY-01	low	0.710516	0.718809	0.0393077	-0.210969
TCGA-YL-A9WK-01	low	0.706127	0.718809	0.0393077	-0.322627
TCGA-KK-A8ID-01	high	0.782094	0.718809	0.0393077	1.61001
TCGA-G9-6369-01	high	0.729222	0.718809	0.0393077	0.264922
TCGA-HC-7820-01	low	0.667511	0.718809	0.0393077	-1.30503
TCGA-G9-6498-01	low	0.680743	0.718809	0.0393077	-0.968401
TCGA-HC-7075-01	low	0.717201	0.718809	0.0393077	-0.0409083
TCGA-V1-A8WW-01	high	0.743903	0.718809	0.0393077	0.638404
TCGA-ZG-A9L6-01	low	0.684826	0.718809	0.0393077	-0.864531
TCGA-HC-8213-01	low	0.683208	0.718809	0.0393077	-0.905693
TCGA-HC-7231-01	low	0.709323	0.718809	0.0393077	-0.241324
TCGA-YL-A9WH-01	high	0.800301	0.718809	0.0393077	2.07319
TCGA-XK-AAJR-01	high	0.740844	0.718809	0.0393077	0.560597
TCGA-EJ-5524-01	high	0.736219	0.718809	0.0393077	0.442926
TCGA-EJ-5527-01	low	0.709527	0.718809	0.0393077	-0.236127
TCGA-ZG-A9LM-01	low	0.703408	0.718809	0.0393077	-0.391781
TCGA-HC-7747-01	low	0.705508	0.718809	0.0393077	-0.338369
TCGA-V1-A9Z9-01	low	0.716094	0.718809	0.0393077	-0.0690478
TCGA-HC-7211-01	high	0.720594	0.718809	0.0393077	0.045426
TCGA-V1-A9O7-01	high	0.723643	0.718809	0.0393077	0.123001
TCGA-YL-A8SQ-01	high	0.727891	0.718809	0.0393077	0.231072
TCGA-KK-A59V-01	high	0.807197	0.718809	0.0393077	2.24862
TCGA-V1-A9OF-01	low	0.711004	0.718809	0.0393077	-0.198557
TCGA-KK-A7B3-01	low	0.683125	0.718809	0.0393077	-0.907812
TCGA-VN-A88O-01	low	0.700639	0.718809	0.0393077	-0.462248
TCGA-HC-A6HY-01	low	0.717174	0.718809	0.0393077	-0.041585
TCGA-KC-A4BR-01	low	0.668662	0.718809	0.0393077	-1.27574
TCGA-YL-A9WJ-01	low	0.71211	0.718809	0.0393077	-0.17042
TCGA-VN-A88N-01	high	0.739697	0.718809	0.0393077	0.531417
TCGA-HC-8261-01	high	0.734396	0.718809	0.0393077	0.396556
TCGA-J4-A67M-01	low	0.65938	0.718809	0.0393077	-1.51187
TCGA-FC-A6HD-01	high	0.782033	0.718809	0.0393077	1.60845
TCGA-HC-A6AO-01	high	0.745561	0.718809	0.0393077	0.680599
TCGA-CH-5739-01	high	0.724294	0.718809	0.0393077	0.13956
TCGA-G9-6379-01	low	0.667363	0.718809	0.0393077	-1.30879
TCGA-G9-6343-01	low	0.697811	0.718809	0.0393077	-0.534191
TCGA-HC-8216-01	high	0.746577	0.718809	0.0393077	0.706431
TCGA-YL-A8SB-01	high	0.722325	0.718809	0.0393077	0.0894733
TCGA-J4-AAU2-01	low	0.701668	0.718809	0.0393077	-0.43607
TCGA-J9-A8CL-01	high	0.768518	0.718809	0.0393077	1.26464
TCGA-KK-A8I4-01	low	0.714906	0.718809	0.0393077	-0.0992734
TCGA-V1-A9OA-01	low	0.69882	0.718809	0.0393077	-0.508519
TCGA-KK-A8IF-01	high	0.724419	0.718809	0.0393077	0.142728
TCGA-KK-A7B1-01	low	0.718228	0.718809	0.0393077	-0.0147607
TCGA-VP-AA1N-01	high	0.735793	0.718809	0.0393077	0.432083
TCGA-XK-AAIW-01	high	0.874968	0.718809	0.0393077	3.97273
TCGA-ZG-A9L5-01	high	0.768803	0.718809	0.0393077	1.27186
TCGA-G9-7522-01	low	0.676791	0.718809	0.0393077	-1.06894
TCGA-J4-A67N-01	low	0.670936	0.718809	0.0393077	-1.21789
TCGA-HC-A6AL-01	high	0.73921	0.718809	0.0393077	0.519018
TCGA-EJ-8469-01	high	0.799978	0.718809	0.0393077	2.06497
TCGA-EJ-A46D-01	low	0.675442	0.718809	0.0393077	-1.10326
TCGA-G9-6367-01	low	0.66965	0.718809	0.0393077	-1.25062
TCGA-VP-A87E-01	low	0.662516	0.718809	0.0393077	-1.43211
TCGA-HC-A4ZV-01	high	0.801132	0.718809	0.0393077	2.09435
TCGA-G9-6373-01	low	0.6966	0.718809	0.0393077	-0.564981
TCGA-G9-6370-01	low	0.68531	0.718809	0.0393077	-0.852205
TCGA-VP-A87J-01	low	0.718095	0.718809	0.0393077	-0.0181621
TCGA-CH-5763-01	low	0.676113	0.718809	0.0393077	-1.0862
TCGA-ZG-A9NI-01	high	0.750814	0.718809	0.0393077	0.814217
TCGA-KK-A6E4-01	low	0.714256	0.718809	0.0393077	-0.115817
TCGA-EJ-A7NF-01	high	0.721794	0.718809	0.0393077	0.0759595
TCGA-KC-A4BN-01	low	0.704992	0.718809	0.0393077	-0.351491
TCGA-J4-A83M-01	low	0.671407	0.718809	0.0393077	-1.20591
TCGA-EJ-5517-01	low	0.695275	0.718809	0.0393077	-0.5987
TCGA-CH-5754-01	high	0.792474	0.718809	0.0393077	1.87407
TCGA-EJ-A46H-01	low	0.641122	0.718809	0.0393077	-1.97637
TCGA-2A-AAYF-01	low	0.684979	0.718809	0.0393077	-0.860633
TCGA-YL-A8HK-01	high	0.725944	0.718809	0.0393077	0.181532
TCGA-2A-A8VX-01	high	0.756224	0.718809	0.0393077	0.951862
TCGA-HC-A48F-01	high	0.719752	0.718809	0.0393077	0.0240027
TCGA-FC-A66V-01	low	0.663807	0.718809	0.0393077	-1.39925
TCGA-HC-7736-01	high	0.734529	0.718809	0.0393077	0.399939
TCGA-V1-A9O9-01	high	0.726724	0.718809	0.0393077	0.20137
TCGA-CH-5789-01	low	0.681824	0.718809	0.0393077	-0.940908
TCGA-HC-A8D1-01	low	0.695559	0.718809	0.0393077	-0.591485
TCGA-EJ-8468-01	low	0.686104	0.718809	0.0393077	-0.83201
TCGA-V1-A9ZK-01	low	0.71851	0.718809	0.0393077	-0.00760179
TCGA-KC-A7FE-01	low	0.693615	0.718809	0.0393077	-0.640936
TCGA-Y6-A9XI-01	low	0.713211	0.718809	0.0393077	-0.142413
TCGA-HC-7210-01	low	0.689349	0.718809	0.0393077	-0.749472
TCGA-G9-6336-01	low	0.697434	0.718809	0.0393077	-0.543767
TCGA-KK-A6E2-01	high	0.73773	0.718809	0.0393077	0.481361
TCGA-KK-A5A1-01	high	0.802253	0.718809	0.0393077	2.12286
TCGA-EJ-A7NK-01	low	0.673395	0.718809	0.0393077	-1.15534
TCGA-2A-AAYO-01	low	0.702389	0.718809	0.0393077	-0.417712
TCGA-V1-A9ZI-01	high	0.728464	0.718809	0.0393077	0.245649
TCGA-G9-A9S4-01	high	0.773739	0.718809	0.0393077	1.39744
TCGA-KK-A7B0-01	low	0.687687	0.718809	0.0393077	-0.791746
TCGA-J4-8198-01	low	0.697423	0.718809	0.0393077	-0.544046
TCGA-HC-7819-01	high	0.720854	0.718809	0.0393077	0.0520456
TCGA-HC-8259-01	low	0.714319	0.718809	0.0393077	-0.114222
TCGA-EJ-5511-01	low	0.68709	0.718809	0.0393077	-0.806931
TCGA-EJ-5495-01	high	0.741202	0.718809	0.0393077	0.569705
TCGA-ZG-A9L2-01	high	0.758541	0.718809	0.0393077	1.0108
TCGA-EJ-A7NJ-01	low	0.672188	0.718809	0.0393077	-1.18604
TCGA-G9-6353-01	low	0.661196	0.718809	0.0393077	-1.46567
TCGA-HC-7821-01	low	0.706282	0.718809	0.0393077	-0.318683
TCGA-V1-A9OX-01	low	0.695264	0.718809	0.0393077	-0.598985
TCGA-EJ-7782-01	high	0.736558	0.718809	0.0393077	0.451563
TCGA-V1-A8MG-01	low	0.703919	0.718809	0.0393077	-0.378806
TCGA-XK-AAJP-01	high	0.766035	0.718809	0.0393077	1.20146
TCGA-EJ-A46I-01	low	0.678162	0.718809	0.0393077	-1.03407
TCGA-G9-A9S7-01	high	0.734169	0.718809	0.0393077	0.390763
TCGA-HC-A76W-01	low	0.704504	0.718809	0.0393077	-0.363919
TCGA-EJ-AB20-01	low	0.699125	0.718809	0.0393077	-0.500742
TCGA-V1-A8X3-01	low	0.695349	0.718809	0.0393077	-0.596817
TCGA-HC-A8CY-01	low	0.712917	0.718809	0.0393077	-0.149892
TCGA-VN-A88I-01	low	0.670939	0.718809	0.0393077	-1.21783
TCGA-HC-7740-01	low	0.558558	0.718809	0.0393077	-4.07682
TCGA-KK-A6E7-01	high	0.775152	0.718809	0.0393077	1.43339
TCGA-KK-A7B4-01	high	0.781428	0.718809	0.0393077	1.59305
TCGA-YL-A9WX-01	low	0.678831	0.718809	0.0393077	-1.01705
TCGA-CH-5744-01	low	0.715488	0.718809	0.0393077	-0.0844646
TCGA-J4-AATZ-01	high	0.728529	0.718809	0.0393077	0.247292
TCGA-HC-8266-01	high	0.721117	0.718809	0.0393077	0.0587364
TCGA-EJ-7781-01	low	0.718299	0.718809	0.0393077	-0.0129672
TCGA-KK-A8I9-01	low	0.711509	0.718809	0.0393077	-0.185702
TCGA-YL-A8SA-01	low	0.687183	0.718809	0.0393077	-0.804558
TCGA-HC-A6AN-01	high	0.720631	0.718809	0.0393077	0.0463775
TCGA-HC-8262-01	high	0.724941	0.718809	0.0393077	0.156002
TCGA-EJ-A46B-01	low	0.664832	0.718809	0.0393077	-1.37318
TCGA-KK-A59Y-01	low	0.700052	0.718809	0.0393077	-0.477174
TCGA-EJ-8470-01	high	0.737764	0.718809	0.0393077	0.482244
TCGA-XK-AAIR-01	low	0.681415	0.718809	0.0393077	-0.951313
TCGA-XJ-A9DI-01	low	0.701948	0.718809	0.0393077	-0.428934
TCGA-J4-A67O-01	low	0.649575	0.718809	0.0393077	-1.76131
TCGA-KC-A7F5-01	high	0.763437	0.718809	0.0393077	1.13536
TCGA-J4-A6M7-01	low	0.716936	0.718809	0.0393077	-0.0476448
TCGA-G9-6339-01	low	0.691	0.718809	0.0393077	-0.707455
TCGA-XK-AAJU-01	low	0.684483	0.718809	0.0393077	-0.873244
TCGA-EJ-5515-01	low	0.690541	0.718809	0.0393077	-0.719127
TCGA-J4-A6G3-01	high	0.770389	0.718809	0.0393077	1.31222
TCGA-SU-A7E7-01	low	0.696931	0.718809	0.0393077	-0.556581
TCGA-CH-5746-01	high	0.720384	0.718809	0.0393077	0.040081
TCGA-HC-7209-01	high	0.730803	0.718809	0.0393077	0.305154
TCGA-J4-A83J-01	high	0.735282	0.718809	0.0393077	0.419103
TCGA-KK-A8IA-01	high	0.759642	0.718809	0.0393077	1.03881
TCGA-EJ-7797-01	low	0.697244	0.718809	0.0393077	-0.548618
TCGA-KK-A7AW-01	low	0.681252	0.718809	0.0393077	-0.955454
TCGA-2A-A8W3-01	high	0.755877	0.718809	0.0393077	0.943047
TCGA-EJ-7788-01	high	0.769123	0.718809	0.0393077	1.28002
TCGA-G9-7525-01	high	0.731702	0.718809	0.0393077	0.328007
TCGA-KK-A6DY-01	low	0.693192	0.718809	0.0393077	-0.6517
TCGA-HC-8257-01	low	0.716424	0.718809	0.0393077	-0.0606576
TCGA-EJ-7321-01	high	0.722945	0.718809	0.0393077	0.105229
TCGA-KK-A8IH-01	low	0.691714	0.718809	0.0393077	-0.689298
TCGA-HI-7169-01	low	0.637722	0.718809	0.0393077	-2.06288
TCGA-YL-A8HM-01	high	0.800918	0.718809	0.0393077	2.08889
TCGA-EJ-7318-01	high	0.719032	0.718809	0.0393077	0.00569586
TCGA-MG-AAMC-01	low	0.699521	0.718809	0.0393077	-0.490675
TCGA-YL-A8SL-01	high	0.79507	0.718809	0.0393077	1.94012
TCGA-G9-6361-01	low	0.691958	0.718809	0.0393077	-0.683078
TCGA-KK-A8IM-01	low	0.707102	0.718809	0.0393077	-0.297812
TCGA-EJ-A8FN-01	low	0.700222	0.718809	0.0393077	-0.472859
TCGA-YL-A8SP-01	high	0.761332	0.718809	0.0393077	1.0818
TCGA-KC-A4BV-01	high	0.727729	0.718809	0.0393077	0.22695
TCGA-V1-A8MF-01	low	0.692731	0.718809	0.0393077	-0.663428
TCGA-XJ-A9DQ-01	low	0.673768	0.718809	0.0393077	-1.14584
TCGA-EJ-7327-01	high	0.747691	0.718809	0.0393077	0.734769
TCGA-KC-A7FD-01	high	0.731491	0.718809	0.0393077	0.322634
TCGA-HC-7077-01	high	0.743524	0.718809	0.0393077	0.628775
TCGA-G9-6354-01	low	0.674171	0.718809	0.0393077	-1.1356
TCGA-V1-A8WS-01	high	0.739319	0.718809	0.0393077	0.521796
TCGA-J4-A67Q-01	low	0.650207	0.718809	0.0393077	-1.74525
TCGA-VN-A88Q-01	low	0.702645	0.718809	0.0393077	-0.411205
TCGA-CH-5794-01	high	0.756389	0.718809	0.0393077	0.956062
TCGA-J4-A83L-01	low	0.670763	0.718809	0.0393077	-1.2223
TCGA-G9-6351-01	low	0.679739	0.718809	0.0393077	-0.993943
TCGA-J9-A8CK-01	high	0.729937	0.718809	0.0393077	0.28312
TCGA-EJ-7791-01	low	0.715437	0.718809	0.0393077	-0.085785
TCGA-EJ-7328-01	low	0.693482	0.718809	0.0393077	-0.644307
TCGA-HC-A6HX-01	low	0.673369	0.718809	0.0393077	-1.15599
TCGA-YL-A8SO-01	high	0.740374	0.718809	0.0393077	0.548625
TCGA-KC-A4BL-01	low	0.706177	0.718809	0.0393077	-0.321344
TCGA-EJ-5497-01	low	0.703155	0.718809	0.0393077	-0.39822
TCGA-YL-A8SH-01	high	0.727994	0.718809	0.0393077	0.233682
TCGA-HC-A76X-01	high	0.742438	0.718809	0.0393077	0.601137
TCGA-G9-6362-01	low	0.694502	0.718809	0.0393077	-0.618368
TCGA-CH-5772-01	high	0.740784	0.718809	0.0393077	0.559074
TCGA-FC-A5OB-01	high	0.757213	0.718809	0.0393077	0.977022
TCGA-QU-A6IP-01	low	0.695184	0.718809	0.0393077	-0.601005
TCGA-VN-A88R-01	high	0.727171	0.718809	0.0393077	0.212755
TCGA-J4-A6G1-01	high	0.768669	0.718809	0.0393077	1.26847
TCGA-QU-A6IN-01	low	0.693123	0.718809	0.0393077	-0.653452
TCGA-EJ-7325-01	low	0.69485	0.718809	0.0393077	-0.609517
TCGA-VN-A88L-01	low	0.693018	0.718809	0.0393077	-0.656124
TCGA-EJ-5501-01	high	0.737758	0.718809	0.0393077	0.482086
TCGA-CH-5768-01	high	0.751271	0.718809	0.0393077	0.825846
TCGA-EJ-5494-01	high	0.726129	0.718809	0.0393077	0.186236
TCGA-HC-7737-01	low	0.706098	0.718809	0.0393077	-0.323367
TCGA-KK-A8IJ-01	low	0.697376	0.718809	0.0393077	-0.545252
TCGA-XJ-A9DX-01	low	0.706719	0.718809	0.0393077	-0.307551
TCGA-HC-A9TH-01	high	0.778468	0.718809	0.0393077	1.51775
TCGA-CH-5765-01	high	0.723742	0.718809	0.0393077	0.125502
TCGA-KK-A6E5-01	low	0.697277	0.718809	0.0393077	-0.547758
TCGA-EJ-5502-01	low	0.694457	0.718809	0.0393077	-0.619523
TCGA-V1-A9Z8-01	high	0.743132	0.718809	0.0393077	0.618795
TCGA-KK-A7AV-01	low	0.689276	0.718809	0.0393077	-0.751326
TCGA-EJ-5532-01	high	0.729242	0.718809	0.0393077	0.265441
TCGA-CH-5791-01	high	0.735683	0.718809	0.0393077	0.42929
TCGA-V1-A9OT-01	low	0.664297	0.718809	0.0393077	-1.3868
TCGA-CH-5740-01	high	0.739709	0.718809	0.0393077	0.53171
TCGA-G9-7523-01	low	0.687129	0.718809	0.0393077	-0.805924
TCGA-CH-5771-01	low	0.702102	0.718809	0.0393077	-0.425029
TCGA-XJ-A83H-01	low	0.717627	0.718809	0.0393077	-0.030058
TCGA-EJ-7330-01	low	0.699645	0.718809	0.0393077	-0.487538
TCGA-J4-A83K-01	low	0.683767	0.718809	0.0393077	-0.891477
TCGA-EJ-7783-01	low	0.717047	0.718809	0.0393077	-0.0448057
TCGA-EJ-7317-01	low	0.715609	0.718809	0.0393077	-0.0813863
TCGA-EJ-A65M-01	high	0.741562	0.718809	0.0393077	0.578861
TCGA-FC-A8O0-01	low	0.678216	0.718809	0.0393077	-1.03268
TCGA-YL-A8HO-01	high	0.74218	0.718809	0.0393077	0.59457
TCGA-ZG-A9N3-01	high	0.862972	0.718809	0.0393077	3.66756
TCGA-ZG-A9MC-01	low	0.70444	0.718809	0.0393077	-0.365542
TCGA-CH-5792-01	high	0.722771	0.718809	0.0393077	0.100802
TCGA-J9-A52B-01	high	0.749572	0.718809	0.0393077	0.782646
TCGA-EJ-5519-01	high	0.744505	0.718809	0.0393077	0.653724
TCGA-XJ-A9DK-01	low	0.704951	0.718809	0.0393077	-0.352534
TCGA-V1-A9Z7-01	high	0.758577	0.718809	0.0393077	1.01173
TCGA-HC-7750-01	low	0.70708	0.718809	0.0393077	-0.298377
TCGA-HI-7170-01	low	0.709463	0.718809	0.0393077	-0.237745
TCGA-G9-6494-01	low	0.706	0.718809	0.0393077	-0.325858
TCGA-HC-A6AS-01	low	0.695201	0.718809	0.0393077	-0.600572
TCGA-EJ-5542-01	high	0.732579	0.718809	0.0393077	0.350318
TCGA-EJ-5526-01	high	0.736525	0.718809	0.0393077	0.450711
TCGA-XQ-A8TA-01	high	0.888509	0.718809	0.0393077	4.31724
TCGA-VP-A87D-01	low	0.70954	0.718809	0.0393077	-0.235799
TCGA-M7-A724-01	high	0.816382	0.718809	0.0393077	2.48231
TCGA-HC-7212-01	high	0.731633	0.718809	0.0393077	0.326251
TCGA-J4-A83N-01	low	0.713742	0.718809	0.0393077	-0.128901
TCGA-CH-5790-01	low	0.686704	0.718809	0.0393077	-0.816749
TCGA-EJ-AB27-01	low	0.706209	0.718809	0.0393077	-0.320538
TCGA-XA-A8JR-01	low	0.674908	0.718809	0.0393077	-1.11684
TCGA-EJ-5509-01	high	0.727506	0.718809	0.0393077	0.221269
TCGA-VN-A943-01	low	0.711648	0.718809	0.0393077	-0.182167
TCGA-EJ-5505-01	high	0.72736	0.718809	0.0393077	0.217542
TCGA-HC-7233-01	low	0.715858	0.718809	0.0393077	-0.0750517
TCGA-CH-5750-01	high	0.773797	0.718809	0.0393077	1.39893
TCGA-HC-7818-01	low	0.70024	0.718809	0.0393077	-0.472378
TCGA-EJ-8472-01	high	0.774328	0.718809	0.0393077	1.41243
TCGA-HC-7232-01	low	0.695335	0.718809	0.0393077	-0.597176
TCGA-V1-A8MU-01	low	0.697359	0.718809	0.0393077	-0.545687
TCGA-XJ-A83G-01	high	0.725287	0.718809	0.0393077	0.164815
TCGA-HC-8265-01	low	0.642989	0.718809	0.0393077	-1.92888
TCGA-KC-A7F3-01	high	0.7223	0.718809	0.0393077	0.0888297
TCGA-YL-A8SI-01	low	0.692696	0.718809	0.0393077	-0.664305
TCGA-YL-A8SC-01	high	0.750889	0.718809	0.0393077	0.816143
TCGA-G9-6365-01	low	0.70646	0.718809	0.0393077	-0.314163
TCGA-H9-A6BY-01	high	0.729408	0.718809	0.0393077	0.269657
TCGA-J4-A67S-01	low	0.680081	0.718809	0.0393077	-0.985245
TCGA-J9-A8CM-01	high	0.750549	0.718809	0.0393077	0.807501
TCGA-G9-6332-01	low	0.684233	0.718809	0.0393077	-0.879607
TCGA-HC-7079-01	high	0.72748	0.718809	0.0393077	0.220605
TCGA-2A-A8VO-01	low	0.693637	0.718809	0.0393077	-0.640371
TCGA-EJ-A65G-01	low	0.684356	0.718809	0.0393077	-0.87649
TCGA-YL-A8SR-01	low	0.699859	0.718809	0.0393077	-0.482074
TCGA-QU-A6IL-01	low	0.70452	0.718809	0.0393077	-0.363491
TCGA-ZG-A9LS-01	low	0.693384	0.718809	0.0393077	-0.64682
TCGA-G9-6329-01	low	0.70376	0.718809	0.0393077	-0.382841
TCGA-KK-A7AY-01	low	0.691603	0.718809	0.0393077	-0.692119
TCGA-CH-5762-01	high	0.728855	0.718809	0.0393077	0.255581
TCGA-KK-A7AU-01	high	0.730009	0.718809	0.0393077	0.284954
TCGA-YL-A9WI-01	high	0.791886	0.718809	0.0393077	1.85912
TCGA-XK-AAJT-01	low	0.678164	0.718809	0.0393077	-1.03401
TCGA-EJ-A6RC-01	low	0.700364	0.718809	0.0393077	-0.469242
TCGA-EJ-7784-01	high	0.741315	0.718809	0.0393077	0.572582
TCGA-FC-7961-01	high	0.776797	0.718809	0.0393077	1.47524
TCGA-EJ-A7NN-01	high	0.738249	0.718809	0.0393077	0.494575
TCGA-EJ-5506-01	low	0.688237	0.718809	0.0393077	-0.777749
TCGA-EJ-7218-01	low	0.716601	0.718809	0.0393077	-0.0561623
TCGA-Y6-A8TL-01	low	0.701691	0.718809	0.0393077	-0.435475
TCGA-VN-A88K-01	low	0.710926	0.718809	0.0393077	-0.200536
TCGA-HC-7748-01	low	0.694207	0.718809	0.0393077	-0.625868
TCGA-2A-AAYU-01	low	0.70666	0.718809	0.0393077	-0.309052
TCGA-2A-A8W1-01	high	0.735958	0.718809	0.0393077	0.436296
TCGA-FC-A4JI-01	high	0.884338	0.718809	0.0393077	4.21111
TCGA-KK-A6E0-01	high	0.750547	0.718809	0.0393077	0.807427
TCGA-G9-7509-01	low	0.680485	0.718809	0.0393077	-0.974965
TCGA-HC-7817-01	high	0.738567	0.718809	0.0393077	0.502672
TCGA-CH-5761-01	high	0.8493	0.718809	0.0393077	3.31975
TCGA-ZG-A8QZ-01	high	0.718834	0.718809	0.0393077	0.000653587
TCGA-G9-6356-01	low	0.712247	0.718809	0.0393077	-0.166924
TCGA-G9-6333-01	low	0.694462	0.718809	0.0393077	-0.619385
TCGA-EJ-7794-01	high	0.724562	0.718809	0.0393077	0.146366
TCGA-ZG-A9LB-01	high	0.772223	0.718809	0.0393077	1.35887
TCGA-XK-AAK1-01	low	0.71078	0.718809	0.0393077	-0.204238
TCGA-YL-A8S9-01	high	0.764266	0.718809	0.0393077	1.15646
TCGA-J4-8200-01	low	0.681235	0.718809	0.0393077	-0.955889
TCGA-ZG-A9L4-01	high	0.744192	0.718809	0.0393077	0.645754
TCGA-ZG-A8QY-01	high	0.746487	0.718809	0.0393077	0.704142
TCGA-YL-A8SK-01	low	0.682888	0.718809	0.0393077	-0.913826
TCGA-ZG-A9ND-01	high	0.743348	0.718809	0.0393077	0.624302
TCGA-KK-A6E1-01	high	0.769517	0.718809	0.0393077	1.29005
TCGA-EJ-5522-01	high	0.730379	0.718809	0.0393077	0.29437
TCGA-WW-A8ZI-01	low	0.699859	0.718809	0.0393077	-0.482074
TCGA-G9-6348-01	low	0.704567	0.718809	0.0393077	-0.362314
TCGA-VP-A87C-01	high	0.728035	0.718809	0.0393077	0.234715
TCGA-EJ-5514-01	high	0.781384	0.718809	0.0393077	1.59194
TCGA-EJ-7786-01	low	0.690726	0.718809	0.0393077	-0.71443
TCGA-XQ-A8TB-01	low	0.708368	0.718809	0.0393077	-0.265605
TCGA-CH-5766-01	low	0.716048	0.718809	0.0393077	-0.0702206
TCGA-X4-A8KQ-01	low	0.697596	0.718809	0.0393077	-0.53964
TCGA-J9-A8CN-01	low	0.705642	0.718809	0.0393077	-0.334947
TCGA-YL-A8SJ-01	high	0.738882	0.718809	0.0393077	0.510678
TCGA-HC-A8D0-01	high	0.7262	0.718809	0.0393077	0.188052
TCGA-TK-A8OK-01	low	0.695727	0.718809	0.0393077	-0.587196
TCGA-EJ-A7NG-01	low	0.671505	0.718809	0.0393077	-1.20341
TCGA-HC-8260-01	low	0.678636	0.718809	0.0393077	-1.02201
TCGA-KK-A8I7-01	high	0.722653	0.718809	0.0393077	0.0978
TCGA-EJ-5510-01	low	0.709673	0.718809	0.0393077	-0.232408
TCGA-KK-A7B2-01	low	0.691388	0.718809	0.0393077	-0.697581
TCGA-EJ-A46E-01	low	0.66855	0.718809	0.0393077	-1.27858
TCGA-G9-7521-01	high	0.73944	0.718809	0.0393077	0.524882
TCGA-V1-A9OQ-01	low	0.700156	0.718809	0.0393077	-0.474518
TCGA-G9-6364-01	low	0.686244	0.718809	0.0393077	-0.828446
TCGA-HC-A631-01	high	0.771615	0.718809	0.0393077	1.34342
TCGA-G9-6366-01	low	0.682622	0.718809	0.0393077	-0.920594
TCGA-HC-7078-01	low	0.708473	0.718809	0.0393077	-0.262933
TCGA-VN-A88P-01	low	0.680163	0.718809	0.0393077	-0.983159
TCGA-XK-AAJA-01	low	0.709437	0.718809	0.0393077	-0.238414
TCGA-ZG-A9M4-01	low	0.702917	0.718809	0.0393077	-0.40429
TCGA-HC-8264-01	low	0.703728	0.718809	0.0393077	-0.383643
TCGA-KK-A8IG-01	low	0.687782	0.718809	0.0393077	-0.789324
TCGA-VP-A87B-01	low	0.71467	0.718809	0.0393077	-0.105295
TCGA-V1-A8ML-01	low	0.698041	0.718809	0.0393077	-0.528337
TCGA-G9-6385-01	low	0.695236	0.718809	0.0393077	-0.599684
TCGA-G9-6347-01	low	0.655993	0.718809	0.0393077	-1.59804
TCGA-J4-A67T-01	low	0.679438	0.718809	0.0393077	-1.00159
TCGA-ZG-A9L0-01	high	0.751139	0.718809	0.0393077	0.8225
TCGA-G9-6499-01	low	0.698379	0.718809	0.0393077	-0.519731
TCGA-V1-A9OL-01	high	0.793307	0.718809	0.0393077	1.89526
TCGA-EJ-7789-01	high	0.804337	0.718809	0.0393077	2.17587
TCGA-ZG-A8QW-01	high	0.764774	0.718809	0.0393077	1.16938
TCGA-KK-A59X-01	high	0.776079	0.718809	0.0393077	1.45698
TCGA-M7-A721-01	low	0.7166	0.718809	0.0393077	-0.0561902
TCGA-EJ-7115-01	low	0.705082	0.718809	0.0393077	-0.349214
TCGA-EJ-A46F-01	high	0.750428	0.718809	0.0393077	0.80441
TCGA-M7-A723-01	low	0.676419	0.718809	0.0393077	-1.07839
TCGA-XK-AAJ3-01	high	0.723853	0.718809	0.0393077	0.128341
TCGA-KK-A7AZ-01	low	0.718424	0.718809	0.0393077	-0.00979221
TCGA-HC-7742-01	high	0.754796	0.718809	0.0393077	0.915538
TCGA-HC-7745-01	low	0.673474	0.718809	0.0393077	-1.15331
TCGA-V1-A8MM-01	low	0.709091	0.718809	0.0393077	-0.247222
TCGA-KC-A7FA-01	low	0.693187	0.718809	0.0393077	-0.651822
TCGA-VP-A875-01	high	0.719456	0.718809	0.0393077	0.0164698
TCGA-HC-7081-01	high	0.722577	0.718809	0.0393077	0.0958614
TCGA-CH-5745-01	low	0.657746	0.718809	0.0393077	-1.55346
TCGA-HI-7168-01	high	0.738722	0.718809	0.0393077	0.506616
TCGA-HC-7738-01	high	0.739923	0.718809	0.0393077	0.537169
TCGA-V1-A9OH-01	high	0.732144	0.718809	0.0393077	0.339272
TCGA-TP-A8TV-01	high	0.73408	0.718809	0.0393077	0.388501
TCGA-J9-A52C-01	low	0.676364	0.718809	0.0393077	-1.07981
TCGA-YL-A9WL-01	high	0.743692	0.718809	0.0393077	0.633044
TCGA-EJ-5521-01	high	0.718995	0.718809	0.0393077	0.00474184
TCGA-EJ-5516-01	high	0.721779	0.718809	0.0393077	0.0755728
TCGA-CH-5738-01	low	0.709337	0.718809	0.0393077	-0.240945
TCGA-G9-7519-01	low	0.691439	0.718809	0.0393077	-0.696281
TCGA-HC-7213-01	high	0.797937	0.718809	0.0393077	2.01306
TCGA-G9-6384-01	low	0.70818	0.718809	0.0393077	-0.27039
TCGA-EJ-8474-01	high	0.738798	0.718809	0.0393077	0.508541
TCGA-HC-A6AQ-01	low	0.677013	0.718809	0.0393077	-1.06329
TCGA-EJ-7793-01	low	0.713229	0.718809	0.0393077	-0.141957
TCGA-HC-7752-01	low	0.631459	0.718809	0.0393077	-2.2222
TCGA-XJ-A83F-01	high	0.718838	0.718809	0.0393077	0.000740084
TCGA-EJ-5508-01	high	0.727141	0.718809	0.0393077	0.211981
TCGA-KK-A7AQ-01	high	0.722388	0.718809	0.0393077	0.0910608
TCGA-XK-AAIV-01	high	0.80873	0.718809	0.0393077	2.28763
TCGA-EJ-7315-01	high	0.742826	0.718809	0.0393077	0.611005
TCGA-J4-A83I-01	low	0.686351	0.718809	0.0393077	-0.825739
TCGA-EJ-7312-01	low	0.704176	0.718809	0.0393077	-0.372256
TCGA-EJ-A7NH-01	low	0.669891	0.718809	0.0393077	-1.24448
TCGA-CH-5737-01	low	0.713492	0.718809	0.0393077	-0.135261
